# Supplementary material
Source: Springer Nature journal article supplement (https://www.springermedizin.de/resource/supplementary/12879_2012_1931_MOESM1_ESM.pdf/9443270)
Supplement: MOESM1 [file 9443270]

**i) Glycophospholipid anchor**

Myo-Inositol-Phosphate  
+ Fatty acids

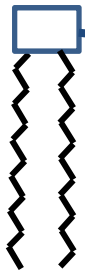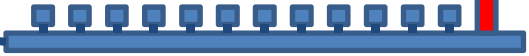

**ii) Mannan core**

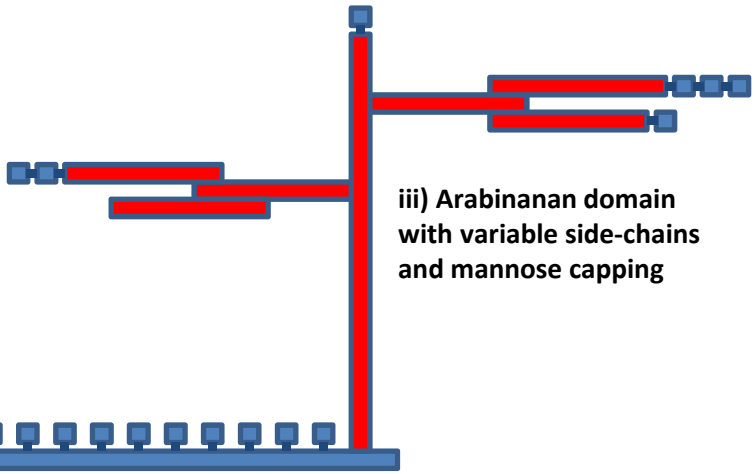

**iii) Arabinanan domain with variable side-chains and mannose capping**
